# Supplementary material for: Ion-imprinted MnO2/CoFe2O4 Janus magnetic micromotors synthesized by a lotus pollen template for highly selective recognition and capture of Pb(ii) ions
Source: Royal Society of Chemistry journal article supplement (doi:10.1039/d2tc02458f), 2022-01-01

## Supporting Information

Yang Han<sup>a</sup>, Yangsai Lyu<sup>b</sup>, Ningning Xing<sup>a</sup>, Xiaolei Zhang<sup>a</sup>, Kaiyuan Hu<sup>a</sup>, Hui Luo<sup>a</sup>, Dickon H.L. Ng<sup>c</sup>, Jia Li<sup>a\*</sup>

<sup>a</sup> School of Material Science and Engineering, University of Jinan, Jinan, 250022, China

<sup>b</sup> Department of Mathematics and Statistics, Queen's University, Kingston, K7L 3N6, Canada

<sup>c</sup> School of Science and Engineering, The Chinese University of Hong Kong (Shenzhen), Shenzhen, China.

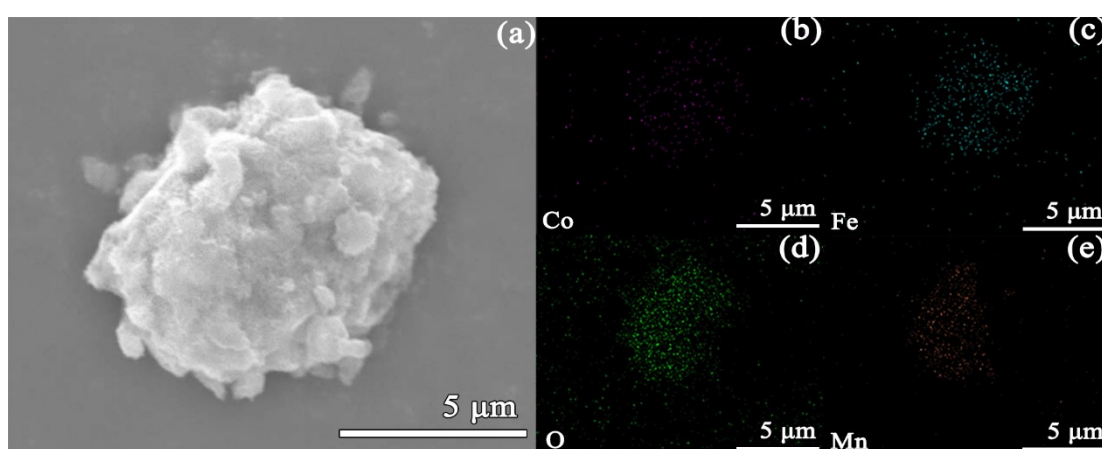

### Results

**Fig. S1. SEM of the Pb-IIP-MMTs and the elemental mapping for Co, Fe, O and Mn.**

**Fig. S2. Time-lapse images depicting motions of Pb-IIP-MMTs Janus micromotor in H<sub>2</sub>O<sub>2</sub> solutions with different concentrations (1 wt.% SDS).**

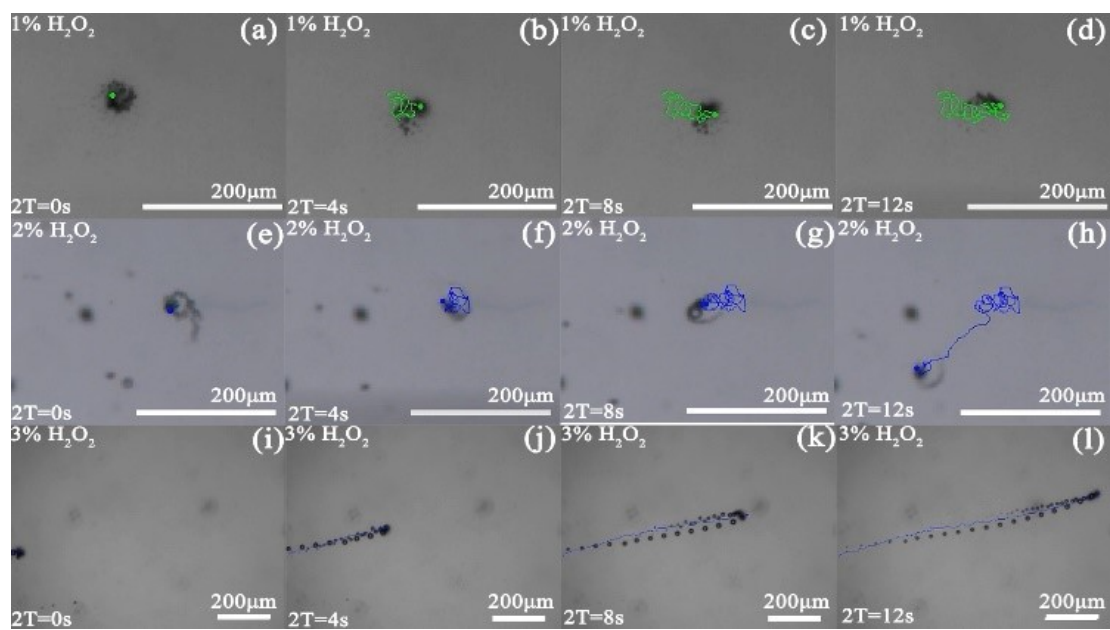

Supplement: d2tc02458f3.pdf [file d2tc02458f3.pdf]
